# Supplementary material for: Coupling of molecular vibration and metasurface modes for efficient mid-infrared emission
Source: Royal Society of Chemistry journal article supplement (doi:10.1039/d1tc04519a), 2021-12-10
Supplement: d1tc04519a1.pdf [file d1tc04519a1.pdf]

# Journal Name

## ARTICLE TYPE

Cite this: DOI: 00.0000/xxxxxxxxxx

### Supporting information figures for Coupling of molecular vibration and metasurface modes for efficient mid-infrared emission

Yoshiaki Nishijima,<sup>\*a</sup> Shinya Morimoto,<sup>a</sup> Armandas Balčytis,<sup>a</sup> Tomoki Hashizume,<sup>b</sup> Ryosuke Matsubara,<sup>b</sup> Atsushi Kubono,<sup>b</sup> Naoki To,<sup>a</sup> Meguya Ryu,<sup>c</sup> Junko Morikawa,<sup>c</sup> and Saulius Juodkazis<sup>def</sup>

Supporting information

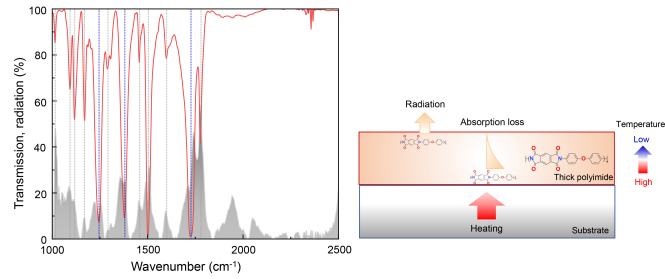

Figure S1. Transmission (red-line) and thermal radiation (shaded-profile) of a 3  $\mu\text{m}$  thick polyimide film.

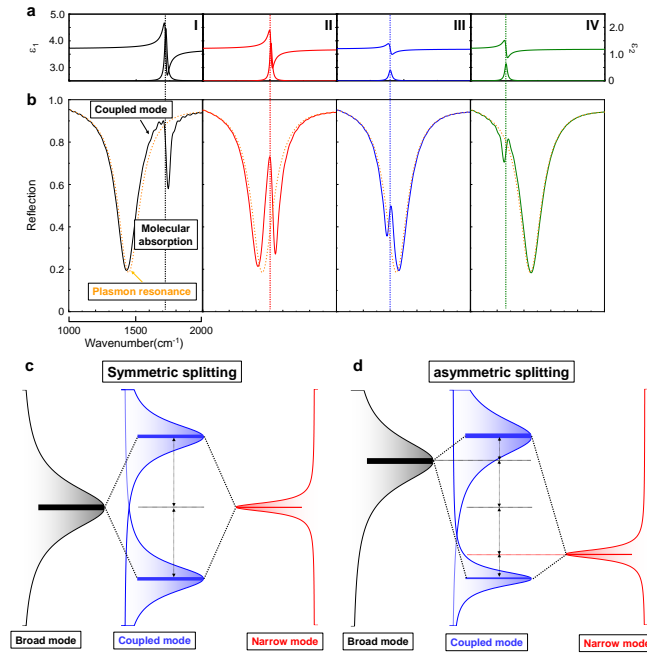

Figure S2. a The model of single Lorentz mode. b The resonance behaviour of plasmon mode and single Lorentz peak. c, d Qualitative model of symmetric/asymmetric coupling mode.

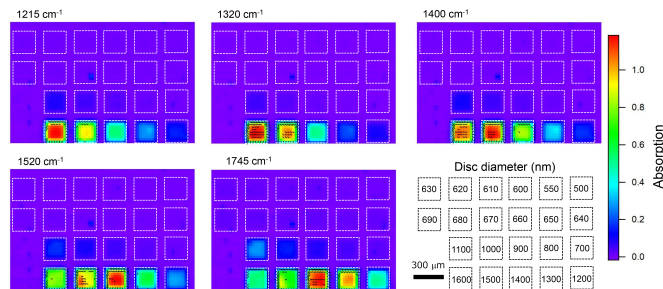

Figure S3. The reflection spectra at four orientations of the linear polarisation ( $0, \pi/4, \pi/2, 3\pi/4$ ) and chemical mapping at selected peaks (I-V). The color map represents the amplitude  $Amp$  and the black lines are the orientation angle  $\theta_{orient}$  of the best fit  $\propto Amp \times \cos 2(\theta - \theta_{orient})$ . Polyimide prepared by vapor deposition polymerization was the insulator layer of MIM structure; thickness was 60 nm determined by ellipsometry. A square has pattern of triangular lattice of nanodisks of diameter  $D$  and period  $\Lambda = 1.5D$  with  $D$  values shown in the sample schematics (right-bottom corner). The orientation at the angle  $\theta_0 = 0^\circ$  is aligned with x-axis (horizontal). The length of the orientation line is proportional to the amplitude of the fit  $Amp$ .
